# Supplementary material
Source: PubMed Central journal article supplement (PMC3672383)
Supplement: NIHMS441756-supplement-01.pdf [file NIHMS441756-supplement-01.pdf]

## Human Biomarkers of Rapid Antidepressant Effects

### *Supplemental Information*

**Table S1. Common biomarker tools used in treatment trials for mood disorders**

| Biomarker tools used to study MDD                                                                   | Recent reviews discussing approach and findings                                                                                           |
|-----------------------------------------------------------------------------------------------------|-------------------------------------------------------------------------------------------------------------------------------------------|
| Positron emission tomography (PET)                                                                  | Mayberg <i>et al.</i> 2003; Takano <i>et al.</i> 2010 (1, 2)                                                                              |
| Single photon emission computerized tomography (SPECT)                                              | Huang <i>et al.</i> 2010; Rigucci <i>et al.</i> 2010 (3, 4)                                                                               |
| Functional magnetic resonance imaging (fMRI)                                                        | Delvecchio <i>et al.</i> 2012 (5)                                                                                                         |
| Brain proton magnetic resonance spectroscopy (1H-MRS)                                               | Caverzasi <i>et al.</i> 2012 (6)                                                                                                          |
| Neurophysiological measures<br>(e.g. sleep EEG, MEG, LDAEP)                                         | Pillai <i>et al.</i> 2011; Leiser <i>et al.</i> 2011; Williams <i>et al.</i> 2010; Hegerl & Juckel 2000; Hegerl <i>et al.</i> 2001 (7-11) |
| Peripheral blood, plasma, and urine markers<br>(e.g. cortisol, BDNF, VEGF)                          | Schmidt <i>et al.</i> 2011; Tadic <i>et al.</i> 2011 (12, 13)                                                                             |
| Cerebrospinal fluid (CSF)                                                                           | Ditzen <i>et al.</i> 2012; Raedler & Wiedemann 2006 (14, 15)                                                                              |
| Saccadic eye movements<br>(marker of serotonergic subtype 5-HT <sub>2A</sub> activity in brainstem) | Flechtner <i>et al.</i> 1997 (16)                                                                                                         |
| Genetics                                                                                            | Weizman <i>et al.</i> 2012 (17)                                                                                                           |
| Proteomics                                                                                          | Kobeissy <i>et al.</i> 2008; Filiou <i>et al.</i> 2011 (18, 19)                                                                           |
| Metabolomics                                                                                        | Quinones & Kaddurah-Daouk 2009 (20)                                                                                                       |

BDNF, brain-derived neurotrophic factor; EEG, electroencephalogram; LDAEP, loudness dependence auditory evoked potentials; MEG, magnetoencephalography; VEGF, vascular endothelial growth factor.

**Table S2. Limitations of developing biomarkers with conventional antidepressant treatments**

| <b>Factors</b>                             | <b>Conventional antidepressants<br/>(i.e., lag of onset of antidepressant<br/>action)</b>                            | <b>Rapid acting interventions</b>                                                                         |
|--------------------------------------------|----------------------------------------------------------------------------------------------------------------------|-----------------------------------------------------------------------------------------------------------|
| Sample size/Recruitment                    | Larger number of subjects needed                                                                                     | Fewer number of subjects needed                                                                           |
| Overall attrition                          | Higher given length of trials                                                                                        | Lower                                                                                                     |
| Cost                                       | Significantly higher given clinical costs                                                                            | Lower                                                                                                     |
| Adherence to protocol                      | More difficult to monitor; more susceptible to influence of alcohol or illicit drug use                              | Much improved; compliance ensured with use of intravenous study drugs                                     |
| Speed of developing biomarkers of response | Prolonged time in developing biomarkers of response, because trials are usually lengthy 8-12 weeks (for acute phase) | Much more rapid; could rapidly lead to testing of many compounds within a relatively short period of time |
| Personalizing treatment                    | Would apply to personalizing treatment with current antidepressants                                                  | May not apply to personalizing treatment, especially to current antidepressants                           |

## Supplemental References

1. Mayberg HS (2003): Positron emission tomography imaging in depression: a neural systems perspective. *Neuroimaging Clin N Am* 13:805-815.
2. Takano A (2010): The application of PET technique for the development and evaluation of novel antipsychotics. *Curr Pharm Des* 16:371-377.
3. Huang Y, Zheng MQ, Gerdes JM (2010): Development of effective PET and SPECT imaging agents for the serotonin transporter: has a twenty-year journey reached its destination? *Curr Top Med Chem* 10:1499-1526.
4. Rigucci S, Serafini G, Pompili M, Kotzalidis GD, Tatarelli R (2010): Anatomical and functional correlates in major depressive disorder: the contribution of neuroimaging studies. *World J Biol Psychiatry* 11:165-180.
5. Delvecchio G, Fossati P, Boyer P, Brambilla P, Falkai P, Gruber O, et al. (2012): Common and distinct neural correlates of emotional processing in bipolar disorder and major depressive disorder: a voxel-based meta-analysis of functional magnetic resonance imaging studies. *Eur Neuropsychopharmacol* 22:100-113.
6. Caverzasi E, Pichiecchio A, Poloni GU, Calligaro A, Pasin M, Palesi F, et al. (2012): Magnetic resonance spectroscopy in the evaluation of treatment efficacy in unipolar major depressive disorder: a review of the literature. *Funct Neurol* 27:13-22.
7. Pillai V, Kalmbach DA, Ciesla JA (2011): A meta-analysis of electroencephalographic sleep in depression: evidence for genetic biomarkers. *Biol Psychiatry* 70:912-919.
8. Leiser SC, Dunlop J, Bowlby MR, Devilbiss DM (2011): Aligning strategies for using EEG as a surrogate biomarker: a review of preclinical and clinical research. *Biochem Pharmacol* 81:1408-1421.
9. Williams MA, Sachdev PS (2010): Magnetoencephalography in neuropsychiatry: ready for application? *Curr Opin Psychiatry* 23:273-277.
10. Hegerl U, Juckel G (2000): Identifying psychiatric patients with serotonergic dysfunctions by event-related potentials. *World J Biol Psychiatry* 1:112-118.
11. Hegerl U, Gallinat J, Juckel G (2001): Event-related potentials. Do they reflect central serotonergic neurotransmission and do they predict clinical response to serotonin agonists? *J Affect Disord* 62:93-100.
12. Schmidt HD, Shelton RC, Duman RS (2011): Functional biomarkers of depression: diagnosis, treatment, and pathophysiology. *Neuropsychopharmacology* 36:2375-2394.
13. Tadic A, Wagner S, Gorbulev S, Dahmen N, Hiemke C, Braus DF, et al. (2011): Peripheral blood and neuropsychological markers for the onset of action of antidepressant drugs in patients with Major Depressive Disorder. *BMC Psychiatry* 11:16.
14. Ditzen C, Tang N, Jastorff AM, Teplytska L, Yassouridis A, Maccarrone G, et al. (2012): Cerebrospinal fluid biomarkers for major depression confirm relevance of associated pathophysiology. *Neuropsychopharmacology* 37:1013-1025
15. Raedler TJ, Wiedemann K (2006): CSF-studies in neuropsychiatric disorders. *Neuro Endocrinol Lett* 27:297-305.
16. Flechtner KM, Steinacher B, Sauer R, Mackert A (1997): Smooth pursuit eye movements in schizophrenia and affective disorder. *Psychol Med* 27:1411-1419.
17. Weizman S, Gonda X, Dome P, Faludi G (2012): Pharmacogenetics of antidepressive drugs: a way towards personalized treatment of major depressive disorder. *Neuropsychopharmacol Hung* 14:87-101.

18. Kobeissy FH, Sadasivan S, Liu J, Gold MS, Wang KK (2008): Psychiatric research: psychoproteomics, degradomics and systems biology. *Expert Rev Proteomics* 5:293-314.
19. Filiou MD, Turck CW, Martins-de-Souza D (2011): Quantitative proteomics for investigating psychiatric disorders. *Proteomics Clin Appl* 5:38-49.
20. Quinones MP, Kaddurah-Daouk R (2009): Metabolomics tools for identifying biomarkers for neuropsychiatric diseases. *Neurobiol Dis* 35:165-176.
